# Supplementary material for: Unprecedented iminobenzosemiquinone and iminobenzoquinone coordinated mononuclear Cu(ii) complex formation under air
Source: Royal Society of Chemistry journal article supplement (doi:10.1039/c4dt03263b), 2014-12-24
Supplement: c4dt03263b1.pdf [file c4dt03263b1.pdf]

## Supporting information

# Unprecedented Iminobenzosemiquinone and Iminobenzoquinone Coordinated Mononuclear Cu(II) Complex Formation under Air

Manas Kumar Mondal,<sup>a</sup> Abul Kalam Biswas,<sup>b</sup> Biswajit Ganguly<sup>b\*</sup> and Chandan Mukherjee<sup>a\*</sup>

<sup>a</sup> *Department of Chemistry, Indian Institute of Technology, Guwahati, 781039, Assam, India.  
Fax: (+) 91-361-258-2349; Tel: (+) 91-361-258-2327; E-mail: cmukherjee@iitg.ernet.in*

<sup>b</sup> *Computation and Simulation Unit (Analytical Discipline and Centralized Instrument Facility),  
CSIR–Central Salt and Marine Chemicals Research Institute, Bhavnagar–364002, India. Fax:  
00–91–278–2567562; Email:– ganguly@csmcri.org*

| <b>Contents</b>                                                                                                                                                              | <b>Page</b> |
|------------------------------------------------------------------------------------------------------------------------------------------------------------------------------|-------------|
| Mass spectra of <b>B</b> , $\text{H}_4\text{L}^{\text{S(AP/AP)}}$ , and $\mathbf{1} \cdot \text{CH}_3\text{CN}$                                                              | S3-S4       |
| A $\mu_{\text{eff}}$ vs $T$ plot for $\mathbf{1} \cdot \text{CH}_3\text{CN}$                                                                                                 | S4          |
| UV-Vis/NIR spectrum of $\mathbf{1} \cdot \text{CH}_3\text{CN}$ (experimental) in $\text{CH}_2\text{Cl}_2$ , and theoretically (TDDFT) obtained spectrum of the same.         | S5          |
| Cyclic voltammograms of the green compound                                                                                                                                   | S5          |
| Time-dependent UV-Vis/NIR changes of the green solid $[\text{Cu}_2\text{L}_2^{\text{S(ISQ/ISQ)}]}$ obtained initially by using $\text{H}_4\text{L}^{\text{S(AP/AP)}}$ ligand | S6          |
| The optimized geometry of complex <b>1</b> and bond distance comparison                                                                                                      | S6-S8       |
| B3LYP/6-31G (d, p) optimized Cartesian coordinates of complex <b>1</b> and the corresponding electronic energies                                                             | S8-S110     |

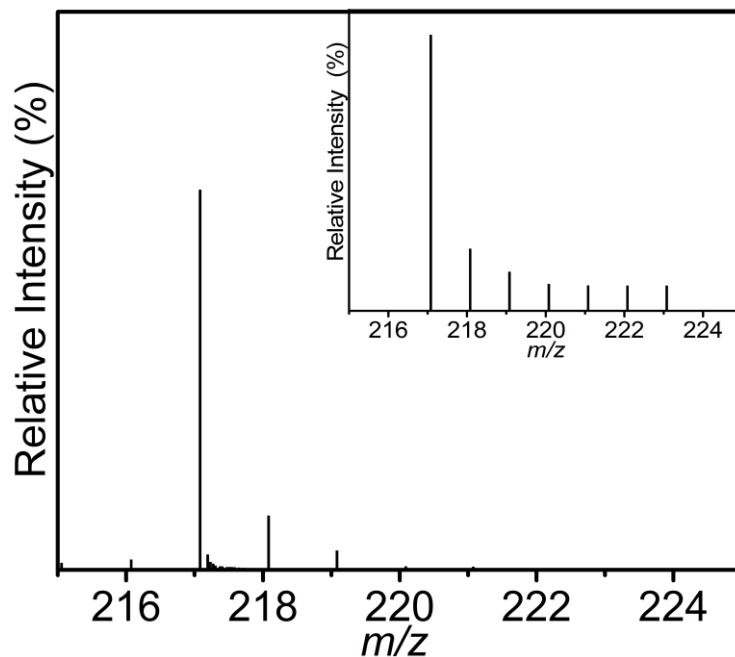

**Figure 1.** ESI-MS (positive mode) for **B** [ $C_{12}H_{13}N_2S$ ]. Insert: Calculated isotope distribution pattern for  $C_{12}H_{13}N_2S$ .

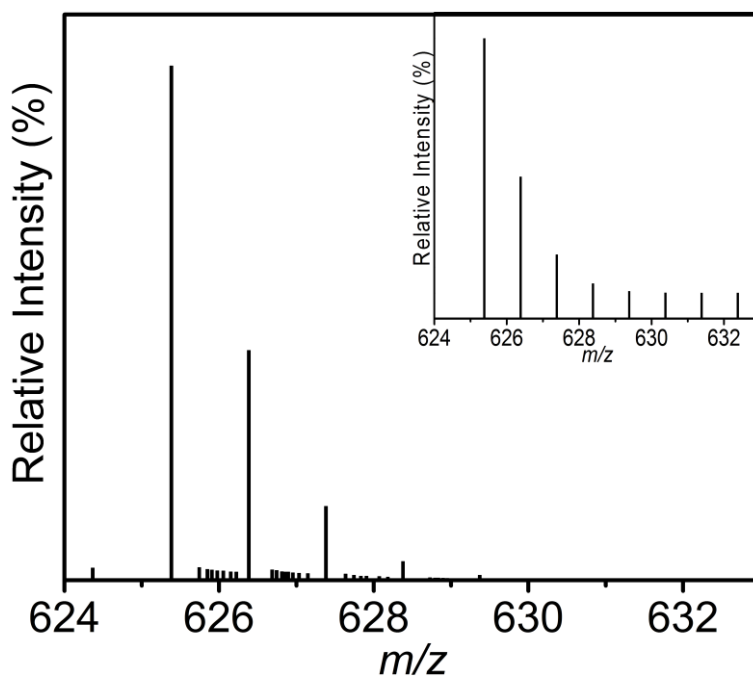

**Figure 2.** ESI-MS (positive mode) for  $H_4L^{S(AP/AP)}$  [ $C_{40}H_{53}N_2O_2S$ ]. Insert: Calculated isotope distribution pattern for [ $C_{40}H_{53}N_2O_2S$ ].

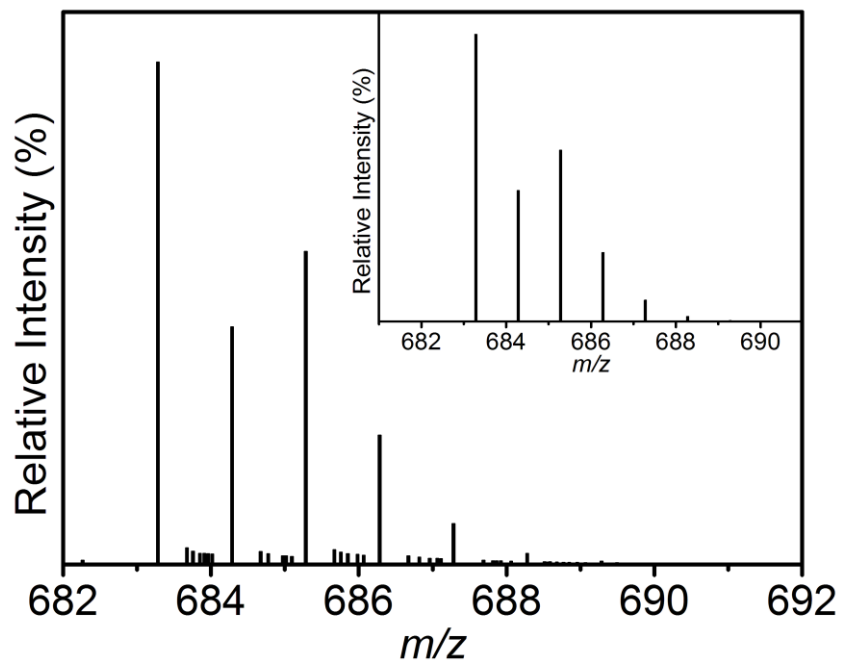

**Figure 3.** ESI-MS (positive mode) for [1-Cl] [ $\{C_{40}H_{48}CuN_2O_2S\}^+$ ]. Insert: Calculated isotope distribution pattern for  $C_{40}H_{48}CuN_2O_2S$ .

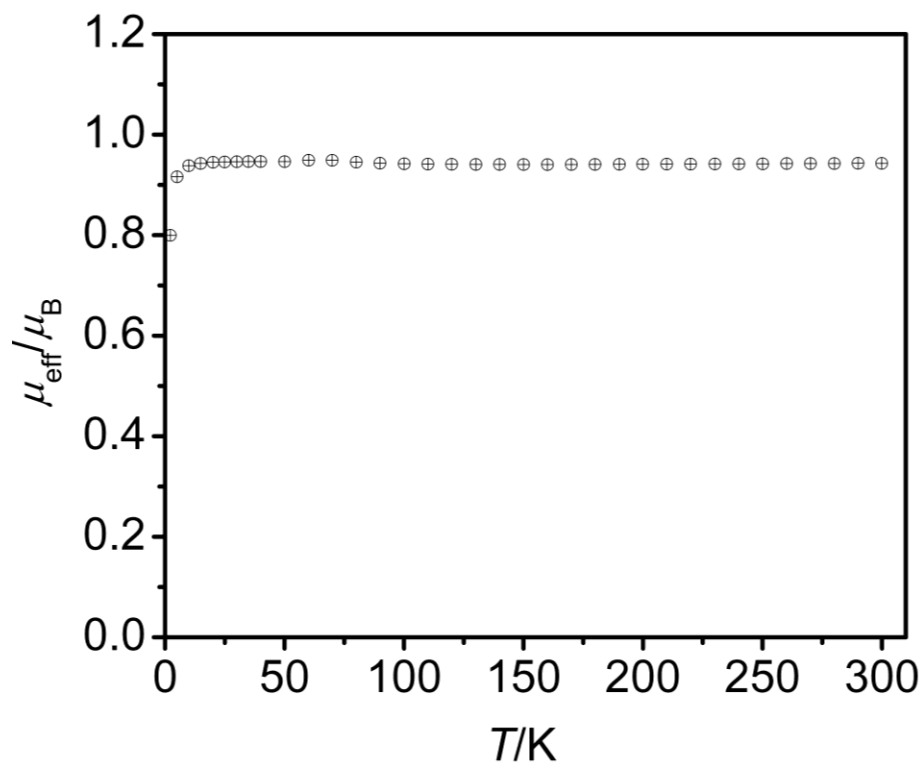

**Figure 4.** A  $\mu_{\text{eff}}$  vs  $T$  plot for  $1 \cdot 1CH_3CN$ .

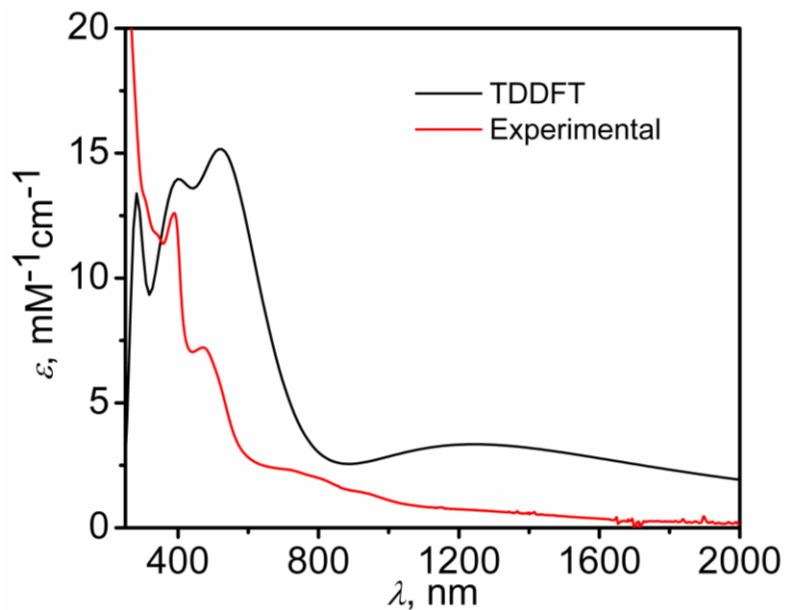

**Figure 5.** UV-Vis/NIR spectrum of **1**•1CH<sub>3</sub>CN (experimental) in CH<sub>2</sub>Cl<sub>2</sub>, and theoretically (TDDFT) obtained spectrum of the same.

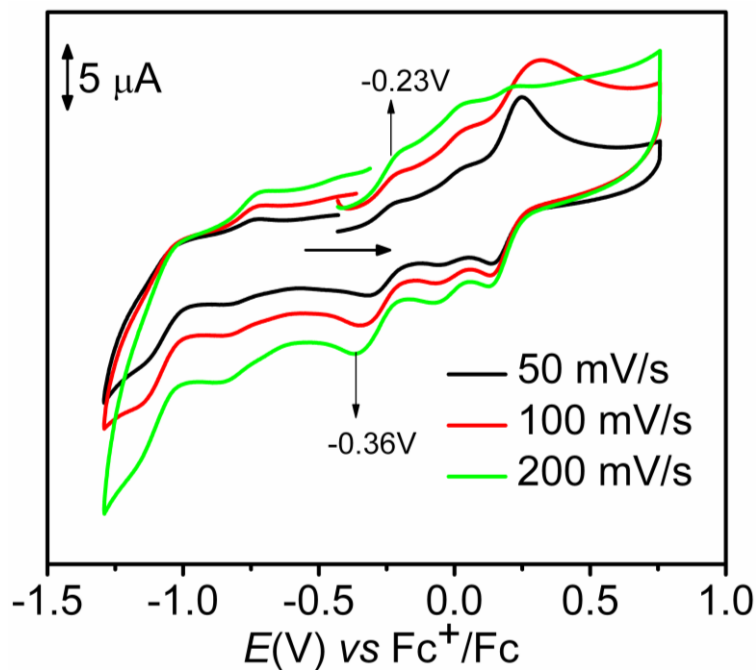

**Figure 6.** Cyclic voltammograms of the green compound in CH<sub>2</sub>Cl<sub>2</sub> using glassy carbon working electrode and Pt counter electrode. Showing low value for the first oxidation peak.

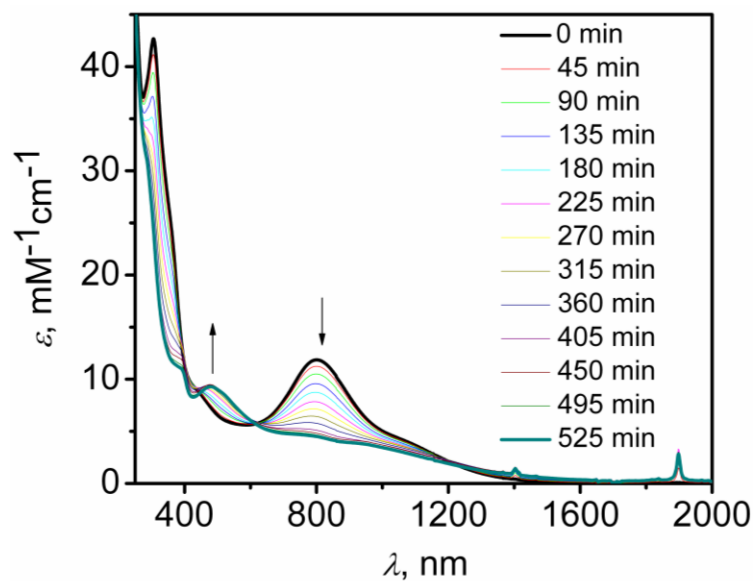

**Figure 7.** Time-dependent UV-Vis/NIR changes of the green solid  $[\text{Cu}_2\text{L}_2^{\text{S}(\text{ISQ}/\text{ISQ})}]$  obtained initially by using  $\text{H}_4\text{L}^{\text{S}(\text{AP}/\text{AP})}$  as the ligand.

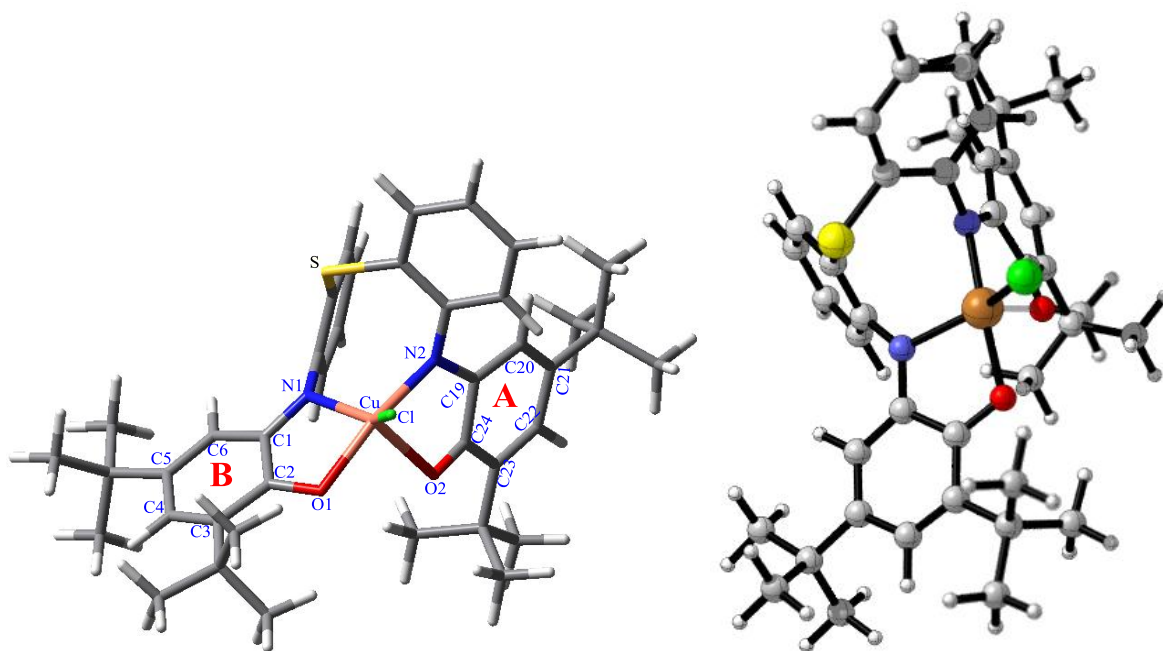

**Figure 8.** The optimized geometry of complex **1** at the B3LYP/6-31G (d, p) level of theory (white = hydrogen, gray = carbon, blue = nitrogen, red = oxygen, lime = chlorine and coral = copper).

**Table 3.** The selective bond distances (Å) and bond angles (°) of X-ray molecular structure and optimized geometry of complex **1**.

| <b>Bond Length</b> | <b>Experimental</b> | <b>Calculated</b> |
|--------------------|---------------------|-------------------|
| Cu1–O1             | 1.967(2)            | 1.971             |
| Cu1–N1             | 1.973(3)            | 2.059             |
| Cu1–N2             | 2.108(2)            | 2.035             |
| Cu1–Cl1            | 2.2193(9)           | 2.296             |
| Cu1–O2             | 2.418(2)            | 2.177             |
| S1–C13             | 1.774(3)            | 1.787             |
| S1–C12             | 1.776(3)            | 1.795             |
| O1–C2              | 1.284(4)            | 1.272             |
| N1–C1              | 1.354(3)            | 1.331             |
| N1–C7              | 1.405(4)            | 1.405             |
| O2–C24             | 1.229(3)            | 1.250             |
| N2–C19             | 1.303(4)            | 1.323             |
| N2–C18             | 1.432(4)            | 1.414             |
| C1–C6              | 1.415(4)            | 1.429             |
| C1–C2              | 1.443(4)            | 1.474             |
| C21–C20            | 1.336(4)            | 1.366             |
| C21–C22            | 1.470(4)            | 1.459             |
| C21–C33            | 1.529(4)            | 1.534             |
| C19–C20            | 1.435(4)            | 1.437             |
| C19–C24            | 1.515(4)            | 1.499             |
| C23–C22            | 1.344(4)            | 1.366             |
| C23–C24            | 1.470(4)            | 1.459             |
| C23–C37            | 1.532(4)            | 1.537             |
| C13–C18            | 1.386(5)            | 1.414             |
| C13–C14            | 1.395(4)            | 1.400             |
| C7–C8              | 1.395(4)            | 1.407             |
| C7–C12             | 1.405(4)            | 1.412             |
| C2–C3              | 1.440(4)            | 1.445             |
| C6–C5              | 1.358(4)            | 1.373             |
| C25–C3             | 1.531(5)            | 1.537             |
| C12–C11            | 1.387(4)            | 1.396             |
| C3–C4              | 1.364(5)            | 1.375             |
| C5–C4              | 1.426(5)            | 1.444             |
| C5–C29             | 1.537(4)            | 1.537             |
| C14–C15            | 1.380(5)            | 1.394             |
| C18–C17            | 1.391(4)            | 1.409             |
| C15–C16            | 1.365(5)            | 1.396             |
| C16–C17            | 1.381(4)            | 1.390             |
| C8–C9              | 1.376(5)            | 1.393             |
| C9–C10             | 1.380(5)            | 1.397             |
| C11–C10            | 1.375(5)            | 1.397             |

| Bond Angle | Experimental | Calculated |
|------------|--------------|------------|
| O1 Cu1 N1  | 82.13(9)     | 79.57      |
| O1 Cu1 N2  | 153.57(10)   | 162.91     |
| N1 Cu1 N2  | 93.61(10)    | 96.15      |
| O1 Cu1 Cl1 | 98.15(7)     | 95.23      |
| N1 Cu1 Cl1 | 160.44(8)    | 137.54     |
| N2 Cu1 Cl1 | 94.40(7)     | 98.91      |
| O1 Cu1 O2  | 82.23(8)     | 87.33      |
| N1 Cu1 O2  | 84.89(10)    | 103.30     |
| N2 Cu1 O2  | 71.40(8)     | 77.50      |
| Cl1 Cu1 O2 | 114.59(7)    | 118.63     |
| C13 S1 C12 | 99.79(15)    | 109.30     |
| C2 O1 Cu1  | 113.16(19)   | 114.86     |
| C1 N1 C7   | 123.6(3)     | 121.46     |
| C1 N1 Cu1  | 112.6(2)     | 112.79     |
| C7 N1 Cu1  | 122.83(18)   | 121.53     |
| C24 O2 Cu1 | 107.6(2)     | 110.86     |
| C19 N2 C18 | 120.4(2)     | 119.61     |
| C19 N2 Cu1 | 118.79(18)   | 115.95     |
| C18 N2 Cu1 | 120.31(19)   | 122.16     |

**Table 4.** B3LYP/6-31G (d, p) optimized Cartesian coordinates of complex **1** and the corresponding electronic energies.

E = -4311.96773 a.u

|    |             |             |             |
|----|-------------|-------------|-------------|
| Cu | -0.22688400 | -0.99707800 | -1.10280100 |
| S  | 0.27126700  | -2.94592200 | 1.74453300  |
| Cl | -0.22623500 | -2.78918000 | -2.53812400 |
| O  | -1.96257900 | -0.28450400 | -1.70596800 |
| N  | -1.07506900 | -0.50029800 | 0.70686100  |
| O  | 0.65921500  | 0.87570900  | -1.77173000 |
| N  | 1.68332700  | -1.14327000 | -0.41530900 |
| C  | -2.30240500 | -0.00007100 | 0.58111500  |
| C  | 4.36401200  | 1.33649600  | -0.09597300 |
| C  | 2.43420500  | -0.06381400 | -0.55843900 |
| C  | 5.77174600  | 1.59149900  | 0.45784000  |
| C  | 3.79166400  | 0.09679600  | -0.11658100 |
| C  | 2.32850800  | 2.43527600  | -1.05782900 |
| C  | 1.75759600  | -3.27579300 | 0.80883200  |
| C  | -0.28696500 | -0.23412500 | 1.83957200  |
| C  | -2.83165800 | -0.14440900 | -0.78727100 |
| C  | -3.14654400 | 0.51576300  | 1.61249700  |
| C  | 1.56591800  | 3.67653200  | -1.54691100 |



|   |             |             |             |
|---|-------------|-------------|-------------|
| C | -4.85312800 | -0.31932300 | -2.40359500 |
| C | 0.49330600  | -1.28129100 | 2.37729800  |
| C | 3.60664300  | 2.48082600  | -0.57868300 |
| C | 2.35460800  | 4.97151000  | -1.27355400 |
| C | 1.71937900  | 1.11196200  | -1.15399700 |
| C | -4.25251100 | -0.02510300 | -1.01926000 |
| C | -4.48221700 | 0.70903900  | 1.36251000  |
| C | 2.34450100  | -4.53369600 | 0.99164600  |
| C | 2.29548500  | -2.39027800 | -0.15369000 |
| C | 3.42890700  | -4.93957400 | 0.21531100  |
| C | -4.99873200 | 0.42846700  | 0.04304100  |
| C | 3.95258500  | -4.07733700 | -0.74996800 |
| C | -0.13730900 | 1.06138900  | 2.36764400  |
| C | -5.46921400 | 1.17741600  | 2.44317700  |
| C | 1.32302500  | 3.57791600  | -3.07402100 |
| C | 3.39532100  | -2.81565400 | -0.92425900 |
| C | -4.47041100 | -1.75613200 | -2.83390400 |
| C | 0.20993200  | 3.77847500  | -0.80624700 |
| C | -6.39039700 | -0.21930400 | -2.39179600 |
| C | 0.74697800  | 1.30226700  | 3.41672800  |
| C | 6.64809500  | 2.21198300  | -0.65941800 |
| C | 1.36389600  | -1.03398800 | 3.44031900  |
| C | 1.49844900  | 0.25649100  | 3.95704100  |
| C | -4.77886300 | 1.42566400  | 3.79672200  |
| C | -6.12888200 | 2.50266700  | 1.98719700  |
| C | -6.56308800 | 0.10090800  | 2.64752800  |
| C | 5.68440600  | 2.57357800  | 1.65239800  |
| C | -4.31603200 | 0.69703700  | -3.44169900 |
| C | 6.45225600  | 0.29863000  | 0.94203700  |
| H | 4.30521700  | -0.76069400 | 0.29196400  |
| H | -2.73535000 | 0.65209700  | 2.60240000  |
| H | 4.10671600  | 3.43961700  | -0.54146900 |
| H | 2.56963800  | 5.10359600  | -0.20785400 |
| H | 3.30070900  | 5.00238100  | -1.82381800 |
| H | 1.75900700  | 5.82916800  | -1.60041500 |
| H | 1.94084300  | -5.19673200 | 1.74980700  |
| H | 3.86055300  | -5.92371800 | 0.36615600  |
| H | -6.05743500 | 0.59252300  | -0.10997100 |
| H | 4.78526800  | -4.38794000 | -1.37235800 |
| H | -0.69786900 | 1.87878100  | 1.92717100  |
| H | 2.27352200  | 3.51637600  | -3.61456000 |
| H | 0.79535000  | 4.47299700  | -3.42117600 |
| H | 0.72291900  | 2.70331100  | -3.32757500 |

|   |             |             |             |
|---|-------------|-------------|-------------|
| H | 3.77488300  | -2.15717400 | -1.69793300 |
| H | -3.38779400 | -1.88573800 | -2.87933000 |
| H | -4.88488900 | -1.96869100 | -3.82549500 |
| H | -4.87940500 | -2.49309300 | -2.13409000 |
| H | 0.36334300  | 3.88358000  | 0.27322100  |
| H | -0.41156100 | 2.89977000  | -0.98547200 |
| H | -0.33596400 | 4.66125000  | -1.15558800 |
| H | -6.77489800 | -0.48520400 | -3.38129000 |
| H | -6.73698800 | 0.79510200  | -2.16853600 |
| H | -6.83957800 | -0.90487800 | -1.66552100 |
| H | 0.85139000  | 2.30889600  | 3.80899000  |
| H | 7.65340300  | 2.40698100  | -0.27184900 |
| H | 6.73787500  | 1.52966900  | -1.51058400 |
| H | 6.24653000  | 3.16078300  | -1.02643400 |
| H | 1.93616600  | -1.85385700 | 3.86158400  |
| H | 2.18410100  | 0.44063000  | 4.77775100  |
| H | -4.00256100 | 2.19413900  | 3.72354800  |
| H | -5.51882100 | 1.77086500  | 4.52518400  |
| H | -4.32411700 | 0.51343400  | 4.19608400  |
| H | -6.67622300 | 2.39067600  | 1.04699000  |
| H | -5.37771300 | 3.28713800  | 1.84960100  |
| H | -6.84128500 | 2.84317300  | 2.74618300  |
| H | -7.12845800 | -0.09353900 | 1.73177400  |
| H | -6.12236300 | -0.84443800 | 2.98016100  |
| H | -7.27403500 | 0.43240900  | 3.41187100  |
| H | 6.68733200  | 2.76145000  | 2.04970900  |
| H | 5.07150900  | 2.15590000  | 2.45747200  |
| H | 5.25628900  | 3.53878800  | 1.36715900  |
| H | -3.23093400 | 0.63508900  | -3.53430800 |
| H | -4.75961300 | 0.49400100  | -4.42287800 |
| H | -4.58234100 | 1.72070900  | -3.15701000 |
| H | 7.45561400  | 0.53245300  | 1.30997100  |
| H | 6.55726200  | -0.43299700 | 0.13467500  |
| H | 5.90082600  | -0.16977600 | 1.76348500  |
